# Supplementary material for: Key issues facing electrospun carbon nanofibers in energy applications: on-going approaches and challenges
Source: Royal Society of Chemistry journal article supplement (doi:10.1039/d0nr03425h), 2020-01-01
Supplement: d0nr03425h1.pdf [file d0nr03425h1.pdf]

**Key Issues Facing Electrospun Carbon Nanofibers in Energy Applications: On-going Approaches and Challenges**

Guangdi Nie,<sup>a,b</sup> Xinwei Zhao,<sup>a</sup> Yaxue Luan,<sup>a</sup> Jiangmin Jiang,<sup>b</sup> Zongkui Kou<sup>b,\*</sup> and John Wang<sup>b,\*</sup>

*<sup>a</sup>Industrial Research Institute of Nonwovens & Technical Textiles, College of Textiles and Clothing,*

*Qingdao University, Qingdao, 266071, P. R. China*

*<sup>b</sup>Department of Materials Science and Engineering, National University of Singapore, Singapore,*

*117574, Singapore*

*\*Corresponding author:*

*E-mail: msekz@nus.edu.sg; msewangj@nus.edu.sg*

**Table S1.** Summary of the activation methods and electrochemical performance of the electrospun CNFs as supercapacitor electrodes.

| Materials               | Precursors and additives                            | Activation methods                                         | Surface area, pores, and conductivity                                                                                                                                                                                      | Electrolyte                          | Specific capacitance                               | Energy/Power density                                | Cyclic Stability        | Ref. |
|-------------------------|-----------------------------------------------------|------------------------------------------------------------|----------------------------------------------------------------------------------------------------------------------------------------------------------------------------------------------------------------------------|--------------------------------------|----------------------------------------------------|-----------------------------------------------------|-------------------------|------|
| PCNFs                   | PAN + PVP + Co(NO <sub>3</sub> ) <sub>2</sub> + DMF | Catalytic graphitization + Inorganic and organic template  | S <sub>BET</sub> = 468.9 m <sup>2</sup> g <sup>-1</sup>                                                                                                                                                                    | 0.5 M H <sub>2</sub> SO <sub>4</sub> | 104.5 F g <sup>-1</sup> at 0.2 A g <sup>-1</sup>   | 3.22 Wh kg <sup>-1</sup> at 600 W kg <sup>-1</sup>  | 94.0% after 2000 cycles | 29   |
| CNF280@700              | PAN + PVP + DMF                                     | Tailoring thermal treatment temperature + Organic template | S <sub>BET</sub> = 230.4 m <sup>2</sup> g <sup>-1</sup> ,<br>V <sub>total</sub> = 0.156 cm <sup>3</sup> g <sup>-1</sup> ,<br>V <sub>micro</sub> = 0.102 cm <sup>3</sup> g <sup>-1</sup>                                    | 2 M KOH                              | 155.0 F g <sup>-1</sup> at 0.5 A g <sup>-1</sup>   | 7.78 Wh kg <sup>-1</sup> at 400 W kg <sup>-1</sup>  | 91.0% after 5000 cycles | 39   |
| HPCNFs                  | PAN + CaCO <sub>3</sub> + DMF/THF                   | Catalytic graphitization + Inorganic template              | S <sub>BET</sub> = 679.0 m <sup>2</sup> g <sup>-1</sup> ,<br>V <sub>total</sub> = 0.410 cm <sup>3</sup> g <sup>-1</sup>                                                                                                    | 6 M KOH                              | 251.0 F g <sup>-1</sup> at 0.5 A g <sup>-1</sup>   | —                                                   | 88.0% after 5000 cycles | 44   |
| Graphene-beaded CNFs    | PAN + oxidized graphene + DMF                       | Integration with graphene + Physical activation by air     | —                                                                                                                                                                                                                          | 6 M KOH                              | 263.7 F g <sup>-1</sup> at 0.1 A g <sup>-1</sup>   | —                                                   | 86.9% after 2000 cycles | 48   |
| CNF/graphene composites | PAN + DMF + GO (ultrasonic spray)                   | Integration with graphene                                  | S <sub>BET</sub> = 480.0 m <sup>2</sup> g <sup>-1</sup> ,<br>V <sub>total</sub> = 0.240 cm <sup>3</sup> g <sup>-1</sup> ,<br>σ = 65.9 S cm <sup>-1</sup>                                                                   | 6 M KOH                              | 183.0 F g <sup>-1</sup> at 1.0 A g <sup>-1</sup>   | —                                                   | 92.0% after 4500 cycles | 49   |
| CNF/graphene composites | PAN + GO + DMF                                      | Integration with graphene                                  | S <sub>BET</sub> = 555.97 m <sup>2</sup> g <sup>-1</sup> ,<br>V <sub>total</sub> = 0.350 cm <sup>3</sup> g <sup>-1</sup> ,<br>V <sub>micro</sub> = 0.266 cm <sup>3</sup> g <sup>-1</sup> ,<br>σ = 13.41 S cm <sup>-1</sup> | 6 M KOH                              | 146.6 F g <sup>-1</sup> at 1.0 mA cm <sup>-2</sup> | 19.44 Wh kg <sup>-1</sup> at 400 W kg <sup>-1</sup> | —                       | 50   |
| CNF/graphene composites | PAN + PVP + graphene                                | Integration with graphene + Organic template               | S <sub>BET</sub> = 627.0 m <sup>2</sup> g <sup>-1</sup> ,<br>V <sub>total</sub> = 0.350 cm <sup>3</sup> g <sup>-1</sup>                                                                                                    | 6 M KOH                              | 265.0 F g <sup>-1</sup> at 0.001 A g <sup>-1</sup> | —                                                   | —                       | 51   |

| Materials               | Precursors and additives                                             | Activation methods                                                                 | Surface area, pores, and conductivity                                                                                                                                                   | Electrolyte                           | Specific capacitance                             | Energy/Power density                               | Cyclic Stability        | Ref. |
|-------------------------|----------------------------------------------------------------------|------------------------------------------------------------------------------------|-----------------------------------------------------------------------------------------------------------------------------------------------------------------------------------------|---------------------------------------|--------------------------------------------------|----------------------------------------------------|-------------------------|------|
| CNFs/rGO                | PAN + GO/PMMA + DMF                                                  | Integration with graphene + Organic template                                       | —                                                                                                                                                                                       | 6 M KOH                               | 140.1 F g <sup>-1</sup> at 1.0 A g <sup>-1</sup> | —                                                  | 96.2% after 1000 cycles | 53   |
| CNF/graphene composites | Phenolic resin + GO/PVA + water                                      | Integration with graphene + Organic template                                       | S <sub>BET</sub> = 767.0 m <sup>2</sup> g <sup>-1</sup> ,<br>V <sub>total</sub> = 0.370 cm <sup>3</sup> g <sup>-1</sup>                                                                 | 6 M KOH                               | 279.1 F g <sup>-1</sup> at 0.2 A g <sup>-1</sup> | —                                                  | 100% after 5000 cycles  | 54   |
| CNFs/CNTs               | PVA + MWCNTs + SDS + starch + <i>p</i> -toluenesulfonic acid + water | Integration with CNTs + Organic template + Physical activation by air              | S <sub>BET</sub> = 350.0 m <sup>2</sup> g <sup>-1</sup> ,<br>V <sub>total</sub> = 0.310 cm <sup>3</sup> g <sup>-1</sup> ,<br>σ = 2.1 S cm <sup>-1</sup>                                 | 1 M H <sub>2</sub> SO <sub>4</sub>    | 170.0 F g <sup>-1</sup> at 10 mV s <sup>-1</sup> | —                                                  | —                       | 55   |
| CNFs/CNTs               | CA + MWCNTs + DMAc + acetone                                         | Integration with CNTs + Physical activation by steam                               | S <sub>BET</sub> = 1120.0 m <sup>2</sup> g <sup>-1</sup> ,<br>σ = 12.55 S cm <sup>-1</sup>                                                                                              | 6 M KOH                               | 160.0 F g <sup>-1</sup> at 0.5 A g <sup>-1</sup> | —                                                  | 94.0% after 1000 cycles | 56   |
| CNFs/CNTs               | PAN + CNTs/maleic anhydride + DMF                                    | Integration with CNTs + Organic template                                           | σ = 2.2 S cm <sup>-1</sup>                                                                                                                                                              | 1 M H <sub>2</sub> SO <sub>4</sub>    | 382.0 F g <sup>-1</sup> at 1.0 A g <sup>-1</sup> | —                                                  | 93.2% after 1000 cycles | 57   |
| CNFs/rGO/CNTs           | PAN + GO + MWCNTs + DMF                                              | Integration with graphene and CNTs                                                 | S <sub>BET</sub> = 175.1 m <sup>2</sup> g <sup>-1</sup> ,<br>V <sub>total</sub> = 0.156 cm <sup>3</sup> g <sup>-1</sup>                                                                 | 0.5 M Na <sub>2</sub> SO <sub>4</sub> | 120.5 F g <sup>-1</sup> at 0.5 A g <sup>-1</sup> | —                                                  | 109% after 5000 cycles  | 58   |
| CNFs/carbon black       | PVP + modified carbon black + ethanol                                | Integration with carbon black                                                      | S <sub>BET</sub> = 548.0 m <sup>2</sup> g <sup>-1</sup> ,<br>V <sub>total</sub> = 0.374 cm <sup>3</sup> g <sup>-1</sup> ,<br>V <sub>micro</sub> = 0.144 cm <sup>3</sup> g <sup>-1</sup> | 6 M KOH                               | 166.0 F g <sup>-1</sup> at 0.1 A g <sup>-1</sup> | —                                                  | —                       | 59   |
| CNFs/ACNWs              | PAN-derived CNFs + PANi coating                                      | Graphitization + Integration with PANi-derived carbon + Chemical activation by KOH | S <sub>BET</sub> = 421.8 m <sup>2</sup> g <sup>-1</sup> ,<br>V <sub>total</sub> = 0.390 cm <sup>3</sup> g <sup>-1</sup>                                                                 | 6 M KOH                               | 176.5 F g <sup>-1</sup> at 0.5 A g <sup>-1</sup> | 24.5 Wh kg <sup>-1</sup> at 250 W kg <sup>-1</sup> | 100% after 10000 cycles | 60   |

| Materials                       | Precursors and additives                                 | Activation methods                                                                                        | Surface area, pores, and conductivity                                                                                                                                                                              | Electrolyte                         | Specific capacitance                                 | Energy/Power density                                    | Cyclic Stability            | Ref. |
|---------------------------------|----------------------------------------------------------|-----------------------------------------------------------------------------------------------------------|--------------------------------------------------------------------------------------------------------------------------------------------------------------------------------------------------------------------|-------------------------------------|------------------------------------------------------|---------------------------------------------------------|-----------------------------|------|
| CNFs/CNTs                       | PAN + MWCNTs + DMF                                       | Integration with CNTs +<br>Activation by a steam mixture<br>of hydroperoxide and water                    | $S_{\text{BET}} = 810.0 \text{ m}^2 \text{ g}^{-1}$ ,<br>$V_{\text{total}} = 0.294 \text{ cm}^3 \text{ g}^{-1}$ ,<br>$V_{\text{micro}} = 0.135 \text{ cm}^3 \text{ g}^{-1}$ ,<br>$\sigma = 5.32 \text{ S cm}^{-1}$ | 1 M $\text{H}_2\text{SO}_4$         | 310.0 F $\text{g}^{-1}$ at<br>0.1 A $\text{g}^{-1}$  | —                                                       | 97.0% after<br>1000 cycles  | 61   |
| CNF/graphene<br>composite paper | Phenolic nanofibers + GO<br>(vacuum-assisted filtration) | Integration with graphene                                                                                 | $\sigma = 7.6 \text{ S cm}^{-1}$                                                                                                                                                                                   | 6 M KOH                             | 112.0 F $\text{cm}^{-3}$ at<br>0.5 A $\text{g}^{-1}$ | —                                                       | —                           | 62   |
| CNF aerogels                    | Pre-oxidized PAN fibers +<br>GO (freeze-drying)          | Integration with graphene                                                                                 | $S_{\text{BET}} = 57.8 \text{ m}^2 \text{ g}^{-1}$                                                                                                                                                                 | 6 M KOH                             | 180.0 F $\text{g}^{-1}$ at<br>1.0 A $\text{g}^{-1}$  | —                                                       | 94.8% after<br>2000 cycles  | 64   |
| CNTs on CNFs                    | Pre-oxidized<br>PAN/PVP/Ni(Ac) <sub>2</sub> + PVP        | Integration with CNTs +<br>Chemical activation by KOH +<br>Catalytic graphitization +<br>Organic template | $S_{\text{BET}} = 950.0 \text{ m}^2 \text{ g}^{-1}$                                                                                                                                                                | EMIMBF <sub>4</sub><br>ionic liquid | 146.8 F $\text{g}^{-1}$ at<br>0.5 A $\text{g}^{-1}$  | 70.7 Wh $\text{kg}^{-1}$ at<br>614.4 W $\text{kg}^{-1}$ | 97.0% after<br>20000 cycles | 65   |
| CNTs on CNFs                    | CA-derived CNFs + CNT<br>growth (CVD)                    | Integration with CNTs +<br>Chemical activation by KOH                                                     | $S_{\text{BET}} = 1211.0 \text{ m}^2 \text{ g}^{-1}$ ,<br>$V_{\text{total}} = 0.530 \text{ cm}^3 \text{ g}^{-1}$ ,<br>$V_{\text{micro}} = 0.390 \text{ cm}^3 \text{ g}^{-1}$                                       | 6 M KOH                             | 149.0 F $\text{g}^{-1}$ at<br>0.5 A $\text{g}^{-1}$  | —                                                       | 90.0% after<br>1000 cycles  | 66   |
| CNF/rGO/rGO<br>paper            | PAN/GO/DMF<br>(electrospinning) + GO<br>(spraying)       | Integration with graphene +<br>Physical activation by air                                                 | $S_{\text{BET}} = 523.0 \text{ m}^2 \text{ g}^{-1}$ ,<br>$V_{\text{total}} = 0.320 \text{ cm}^3 \text{ g}^{-1}$ ,<br>$V_{\text{micro}} = 0.170 \text{ cm}^3 \text{ g}^{-1}$                                        | 6 M KOH                             | 241.0 F $\text{g}^{-1}$ at<br>0.2 A $\text{g}^{-1}$  | —                                                       | 100% after<br>2000 cycles   | 67   |
| HPCNFs                          | PAN + SiO <sub>2</sub> + DMF                             | Inorganic template + Chemical<br>activation by KOH                                                        | $S_{\text{BET}} = 1632.0 \text{ m}^2 \text{ g}^{-1}$ ,<br>$V_{\text{total}} = 1.530 \text{ cm}^3 \text{ g}^{-1}$ ,<br>$V_{\text{micro}} = 0.600 \text{ cm}^3 \text{ g}^{-1}$                                       | 1 M $\text{H}_2\text{SO}_4$         | 197.0 F $\text{g}^{-1}$ at 5<br>mV $\text{s}^{-1}$   | —                                                       | —                           | 70   |

| Materials            | Precursors and additives                                                   | Activation methods                                        | Surface area, pores, and conductivity                                                                                                                                                   | Electrolyte                        | Specific capacitance                                | Energy/Power density                                    | Cyclic Stability            | Ref. |
|----------------------|----------------------------------------------------------------------------|-----------------------------------------------------------|-----------------------------------------------------------------------------------------------------------------------------------------------------------------------------------------|------------------------------------|-----------------------------------------------------|---------------------------------------------------------|-----------------------------|------|
| Mesoporous CNFs      | PAN + SiO <sub>2</sub> + DMF                                               | Inorganic template                                        | S <sub>BET</sub> = 496.5 m <sup>2</sup> g <sup>-1</sup> ,<br>V <sub>total</sub> = 1.490 cm <sup>3</sup> g <sup>-1</sup> ,<br>V <sub>micro</sub> = 0.581 cm <sup>3</sup> g <sup>-1</sup> | 1 M H <sub>2</sub> SO <sub>4</sub> | 247.8 F g <sup>-1</sup> at<br>1.0 A g <sup>-1</sup> | 9.9 Wh kg <sup>-1</sup> at<br>690 W kg <sup>-1</sup>    | 88.9% after<br>5000 cycles  | 71   |
| Nitrogen-doped PCNFs | PAN + PVP + SiO <sub>2</sub> + DMF                                         | Inorganic and organic template + Nitrogen doping          | S <sub>BET</sub> = 57.0 m <sup>2</sup> g <sup>-1</sup> ,<br>V <sub>total</sub> = 0.260 cm <sup>3</sup> g <sup>-1</sup>                                                                  | 1 M H <sub>2</sub> SO <sub>4</sub> | 242.0 F g <sup>-1</sup> at<br>0.2 A g <sup>-1</sup> | —                                                       | 99.0% after<br>5000 cycles  | 72   |
| Bubbled CNFs         | PAN + SiO <sub>2</sub> + DMF                                               | Inorganic template                                        | S <sub>BET</sub> = 593.2 m <sup>2</sup> g <sup>-1</sup> ,<br>V <sub>total</sub> = 0.109 cm <sup>3</sup> g <sup>-1</sup>                                                                 | 1 M H <sub>2</sub> SO <sub>4</sub> | 287.0 F g <sup>-1</sup> at<br>0.4 A g <sup>-1</sup> | —                                                       | 90.6% after<br>500 cycles   | 73   |
| Bubbled PCNFs        | ZnO nanofibers + ethanol                                                   | Inorganic template                                        | S <sub>BET</sub> = 588.0 m <sup>2</sup> g <sup>-1</sup>                                                                                                                                 | 1 M H <sub>2</sub> SO <sub>4</sub> | 150.0 F g <sup>-1</sup> at<br>0.5 A g <sup>-1</sup> | —                                                       | 94.1% after<br>35000 cycles | 74   |
| Inner PCNFs          | SnO <sub>2</sub> /Fe <sub>2</sub> O <sub>3</sub> nanofibers + PDA          | Inorganic template                                        | S <sub>BET</sub> = 967.0 m <sup>2</sup> g <sup>-1</sup> ,<br>V <sub>total</sub> = 1.560 cm <sup>3</sup> g <sup>-1</sup>                                                                 | 6 M KOH                            | 328.0 F g <sup>-1</sup> at<br>1.0 A g <sup>-1</sup> | 13.6 Wh kg <sup>-1</sup> at<br>500 W kg <sup>-1</sup>   | 73.0% after<br>5000 cycles  | 75   |
| CNFs                 | PAN + NaCl + DMF                                                           | Inorganic template                                        | S <sub>BET</sub> = 24.0 m <sup>2</sup> g <sup>-1</sup> ,<br>V <sub>total</sub> = 0.017 cm <sup>3</sup> g <sup>-1</sup>                                                                  | 1 M H <sub>2</sub> SO <sub>4</sub> | 204.0 F g <sup>-1</sup> at<br>0.5 A g <sup>-1</sup> | —                                                       | >100% after<br>1000 cycles  | 76   |
| Nitrogen-rich HPCNFs | PAN/PVP nanofibers + H <sub>2</sub> O + KCl/K <sub>2</sub> CO <sub>3</sub> | Inorganic and organic template + Nitrogen doping          | S <sub>BET</sub> = 726.0 m <sup>2</sup> g <sup>-1</sup> ,<br>V <sub>total</sub> = 0.510 cm <sup>3</sup> g <sup>-1</sup>                                                                 | 6 M KOH                            | 293.0 F g <sup>-1</sup> at<br>0.2 A g <sup>-1</sup> | —                                                       | 95.7% after<br>1000 cycles  | 77   |
| HPCNFs               | PAN + K <sub>2</sub> S + DMF                                               | Inorganic template                                        | S <sub>BET</sub> = 835.0 m <sup>2</sup> g <sup>-1</sup> ,<br>V <sub>total</sub> = 0.678 cm <sup>3</sup> g <sup>-1</sup> ,<br>V <sub>micro</sub> = 0.387 cm <sup>3</sup> g <sup>-1</sup> | 6 M KOH                            | 210.7 F g <sup>-1</sup> at<br>0.2 A g <sup>-1</sup> | 27.2 Wh kg <sup>-1</sup> at<br>508.7 W kg <sup>-1</sup> | 89.0% after<br>10000 cycles | 78   |
| Ribbon-shaped CNFs   | Phenolic resin + PVP + Co(NO <sub>3</sub> ) <sub>2</sub> + ethanol         | Catalytic graphitization + Inorganic and organic template | S <sub>BET</sub> = 463.0 m <sup>2</sup> g <sup>-1</sup> ,<br>V <sub>total</sub> = 0.575 cm <sup>3</sup> g <sup>-1</sup>                                                                 | 6 M KOH                            | 228.0 F g <sup>-1</sup> at<br>0.2 A g <sup>-1</sup> | —                                                       | 95.0% after<br>5000 cycles  | 81   |

| Materials                              | Precursors and additives                                       | Activation methods                                     | Surface area, pores, and conductivity                                                                                                                                                                                    | Electrolyte                          | Specific capacitance                                | Energy/Power density                                  | Cyclic Stability            | Ref. |
|----------------------------------------|----------------------------------------------------------------|--------------------------------------------------------|--------------------------------------------------------------------------------------------------------------------------------------------------------------------------------------------------------------------------|--------------------------------------|-----------------------------------------------------|-------------------------------------------------------|-----------------------------|------|
| PCNFs                                  | Pre-oxidized PI/PVP fibers + Mg(NO <sub>3</sub> ) <sub>2</sub> | Inorganic and organic template                         | S <sub>BET</sub> = 1836 m <sup>2</sup> g <sup>-1</sup> ,<br>V <sub>total</sub> = 0.880 cm <sup>3</sup> g <sup>-1</sup>                                                                                                   | 1 M LiPF <sub>6</sub>                | 140.0 F g <sup>-1</sup> at<br>0.1 A g <sup>-1</sup> | 30.0 Wh kg <sup>-1</sup> at<br>25 W kg <sup>-1</sup>  | 91.0% after<br>3000 cycles  | 82   |
| HPCNFs                                 | Lignin + PVP + Mg(NO <sub>3</sub> ) <sub>2</sub> + DMF         | Inorganic and organic template                         | S <sub>BET</sub> = 1140 m <sup>2</sup> g <sup>-1</sup> ,<br>V <sub>total</sub> = 0.627 cm <sup>3</sup> g <sup>-1</sup> ,<br>V <sub>micro</sub> = 0.137 cm <sup>3</sup> g <sup>-1</sup>                                   | 6 M KOH                              | 248.0 F g <sup>-1</sup> at<br>0.2 A g <sup>-1</sup> | —                                                     | 97.0% after<br>1000 cycles  | 83   |
| Nitrogen-doped PCNFs                   | PAN + Mg(OH) <sub>2</sub> + DMF                                | Inorganic template + Nitrogen doping                   | S <sub>BET</sub> = 926.4 m <sup>2</sup> g <sup>-1</sup> ,<br>V <sub>total</sub> = 0.420 cm <sup>3</sup> g <sup>-1</sup>                                                                                                  | 6 M KOH                              | 327.3 F g <sup>-1</sup> at<br>1.0 A g <sup>-1</sup> | 42.5 Wh kg <sup>-1</sup> at<br>500 W kg <sup>-1</sup> | 93.0% after<br>10000 cycles | 84   |
| Activated PCNFs                        | PAN/PVP/DMF (shell) + PVP/SnCl <sub>2</sub> /DMF (core)        | Inorganic and organic template                         | S <sub>BET</sub> = 1082 m <sup>2</sup> g <sup>-1</sup> ,<br>V <sub>total</sub> = 0.649 cm <sup>3</sup> g <sup>-1</sup> ,<br>V <sub>micro</sub> = 0.422 cm <sup>3</sup> g <sup>-1</sup>                                   | 0.5 M H <sub>2</sub> SO <sub>4</sub> | 289.0 F g <sup>-1</sup> at 10<br>mV s <sup>-1</sup> | 14.4 Wh kg <sup>-1</sup> at<br>80 W kg <sup>-1</sup>  | ~100% after<br>10000 cycles | 85   |
| Oxygen/nitrogen <i>co</i> -doped PCNFs | PAN + SnCl <sub>2</sub> + DMF                                  | Inorganic template + Oxygen/nitrogen <i>co</i> -doping | S <sub>BET</sub> = 772.7 m <sup>2</sup> g <sup>-1</sup> ,<br>V <sub>total</sub> = 0.470 cm <sup>3</sup> g <sup>-1</sup> ,<br>V <sub>micro</sub> = 0.300 cm <sup>3</sup> g <sup>-1</sup>                                  | 6 M KOH                              | 233.1 F g <sup>-1</sup> at<br>0.2 A g <sup>-1</sup> | 5.14 Wh kg <sup>-1</sup> at<br>100 W kg <sup>-1</sup> | ~100% after<br>10000 cycles | 86   |
| PCNFs                                  | PAN + ZnCl <sub>2</sub> + DMF                                  | Inorganic template                                     | S <sub>BET</sub> = 550.0 m <sup>2</sup> g <sup>-1</sup> ,<br>V <sub>total</sub> = 0.340 cm <sup>3</sup> g <sup>-1</sup> ,<br>V <sub>micro</sub> = 0.260 cm <sup>3</sup> g <sup>-1</sup> ,<br>σ = 1.39 S cm <sup>-1</sup> | 6 M KOH                              | 140.0 F g <sup>-1</sup> at 5<br>mV s <sup>-1</sup>  | —                                                     | —                           | 87   |
| PCNFs                                  | PAN + CA + ZnCl <sub>2</sub> + DMAc + acetone                  | Inorganic and organic template                         | S <sub>BET</sub> = 887.0 m <sup>2</sup> g <sup>-1</sup> ,<br>V <sub>total</sub> = 0.410 cm <sup>3</sup> g <sup>-1</sup> ,<br>V <sub>micro</sub> = 0.320 cm <sup>3</sup> g <sup>-1</sup>                                  | 6 M KOH                              | 280.0 F g <sup>-1</sup> at<br>0.1 A g <sup>-1</sup> | —                                                     | 96.8% after<br>2000 cycles  | 88   |

| Materials                  | Precursors and additives                                      | Activation methods                 | Surface area, pores, and conductivity                                                                                                                                             | Electrolyte                      | Specific capacitance                             | Energy/Power density                                 | Cyclic Stability         | Ref. |
|----------------------------|---------------------------------------------------------------|------------------------------------|-----------------------------------------------------------------------------------------------------------------------------------------------------------------------------------|----------------------------------|--------------------------------------------------|------------------------------------------------------|--------------------------|------|
| Cross-linked PCNFs         | PAN + ZnCl <sub>2</sub> + DMF                                 | Inorganic template                 | S <sub>BET</sub> = 520.0 m <sup>2</sup> g <sup>-1</sup> , σ = 2.33 S cm <sup>-1</sup>                                                                                             | 6 M KOH                          | 163.0 F g <sup>-1</sup> at 1.0 A g <sup>-1</sup> | 3.04 Wh kg <sup>-1</sup> at 15000 W kg <sup>-1</sup> | 97.3% after 60000 cycles | 89   |
| Bamboo-like graphitic CNFs | PAN + TEOS + DMF                                              | Organic template                   | S <sub>BET</sub> = 1912 m <sup>2</sup> g <sup>-1</sup> , V <sub>total</sub> = 2.270 cm <sup>3</sup> g <sup>-1</sup>                                                               | 3 M KOH                          | 236.0 F g <sup>-1</sup> at 5.0 A g <sup>-1</sup> | 2.37 Wh kg <sup>-1</sup> at 61300 W kg <sup>-1</sup> | 96.0% after 10000 cycles | 90   |
| HPCNFs                     | PAN + PMMA + TEOS + DMF                                       | Organic template                   | S <sub>BET</sub> = 698.9 m <sup>2</sup> g <sup>-1</sup> , V <sub>total</sub> = 0.212 cm <sup>3</sup> g <sup>-1</sup> , V <sub>micro</sub> = 0.196 cm <sup>3</sup> g <sup>-1</sup> | 6 M KOH                          | 170.0 F g <sup>-1</sup> at 1.0 A g <sup>-1</sup> | 7.20 Wh kg <sup>-1</sup> at 7500 W kg <sup>-1</sup>  | 94.2% after 8000 cycles  | 91   |
| Double-capillary CNFs      | PVP/TEOS/ethanol/acetic acid (outer) + Lignin/PEO/DMF (inner) | Organic template                   | S <sub>BET</sub> = 870.0 m <sup>2</sup> g <sup>-1</sup> , V <sub>total</sub> = 0.720 cm <sup>3</sup> g <sup>-1</sup>                                                              | EMIMBF <sub>4</sub> ionic liquid | 245.0 F g <sup>-1</sup> at 0.5 A g <sup>-1</sup> | 56.6 Wh kg <sup>-1</sup> at 1760 W kg <sup>-1</sup>  | 94.0% after 10000 cycles | 92   |
| PCNFs                      | PVP + PFA + TEOS + HCl + pluronic F127 + ethanol              | Organic template                   | S <sub>BET</sub> = 897.0 m <sup>2</sup> g <sup>-1</sup> , V <sub>total</sub> = 0.723 cm <sup>3</sup> g <sup>-1</sup>                                                              | 6 M KOH                          | 205.5 F g <sup>-1</sup> at 20 mV s <sup>-1</sup> | —                                                    | 97.0% after 1500 cycles  | 93   |
| Porous carbon microfibers  | PVP + resin + TEOS + HCl + pluronic P123 + ethanol            | Organic template                   | S <sub>BET</sub> = 2092 m <sup>2</sup> g <sup>-1</sup> , V <sub>total</sub> = 1.370 cm <sup>3</sup> g <sup>-1</sup>                                                               | 6 M KOH                          | 252.0 F g <sup>-1</sup> at 0.5 A g <sup>-1</sup> | —                                                    | 97.0% after 4000 cycles  | 94   |
| Nitrogen-doped PCNFs       | PAN + PMMA + TEOS + TPU + DMF                                 | Organic template + Nitrogen doping | S <sub>BET</sub> = 1126 m <sup>2</sup> g <sup>-1</sup> , V <sub>total</sub> = 0.424 cm <sup>3</sup> g <sup>-1</sup>                                                               | 6 M KOH                          | 207.0 F g <sup>-1</sup> at 0.2 A g <sup>-1</sup> | —                                                    | 99.0% after 8000 cycles  | 95   |
| PCNFs                      | PVP + resin + TEOS + HCl + pluronic F127 + ethanol            | Organic template                   | S <sub>BET</sub> = 1674 m <sup>2</sup> g <sup>-1</sup> , V <sub>total</sub> = 1.414 cm <sup>3</sup> g <sup>-1</sup> , V <sub>micro</sub> = 0.508 cm <sup>3</sup> g <sup>-1</sup>  | 6 M KOH                          | 210.0 F g <sup>-1</sup> at 0.5 A g <sup>-1</sup> | —                                                    | —                        | 96   |

| Materials                      | Precursors and additives                                                                         | Activation methods                           | Surface area, pores, and conductivity                                                                                                                                                   | Electrolyte                        | Specific capacitance                                | Energy/Power density                                    | Cyclic Stability            | Ref. |
|--------------------------------|--------------------------------------------------------------------------------------------------|----------------------------------------------|-----------------------------------------------------------------------------------------------------------------------------------------------------------------------------------------|------------------------------------|-----------------------------------------------------|---------------------------------------------------------|-----------------------------|------|
| Activated PCNFs                | PAN + Cu(Ac) <sub>2</sub> + DMF                                                                  | Organic template                             | S <sub>BET</sub> = 395.6 m <sup>2</sup> g <sup>-1</sup> ,<br>V <sub>total</sub> = 0.242 cm <sup>3</sup> g <sup>-1</sup> ,<br>V <sub>micro</sub> = 0.149 cm <sup>3</sup> g <sup>-1</sup> | 3 M KOH                            | 183.3 F g <sup>-1</sup> at<br>1.0 A g <sup>-1</sup> | —                                                       | —                           | 98   |
| Nitrogen-doped HPCNFs          | PAN + Mg(Ac) <sub>2</sub> + DMF                                                                  | Organic template + Nitrogen doping           | S <sub>BET</sub> = 684.3 m <sup>2</sup> g <sup>-1</sup> ,<br>V <sub>total</sub> = 0.560 cm <sup>3</sup> g <sup>-1</sup> ,<br>V <sub>micro</sub> = 0.260 cm <sup>3</sup> g <sup>-1</sup> | 6 M KOH                            | 263.0 F g <sup>-1</sup> at<br>1.0 A g <sup>-1</sup> | 9.15 Wh kg <sup>-1</sup> at<br>500 W kg <sup>-1</sup>   | 94.2% after<br>10000 cycles | 101  |
| Nitrogen-doped HPCNFs          | PAN + ZIF-8 + DMF                                                                                | Organic template + Nitrogen doping           | S <sub>BET</sub> = 417.9 m <sup>2</sup> g <sup>-1</sup> ,<br>V <sub>total</sub> = 0.680 cm <sup>3</sup> g <sup>-1</sup>                                                                 | 2 M H <sub>2</sub> SO <sub>4</sub> | 307.2 F g <sup>-1</sup> at<br>1.0 A g <sup>-1</sup> | 10.96 Wh kg <sup>-1</sup><br>at 250 W kg <sup>-1</sup>  | 98.2% after<br>10000 cycles | 102  |
| Mesoporous CNFs                | PVA + tin-citric aqueous solution + Triton X-100                                                 | Organic template                             | S <sub>BET</sub> = 800.0 m <sup>2</sup> g <sup>-1</sup> ,<br>V <sub>total</sub> = 0.600 cm <sup>3</sup> g <sup>-1</sup> ,<br>V <sub>micro</sub> = 0.170 cm <sup>3</sup> g <sup>-1</sup> | 6 M KOH                            | 103.0 F g <sup>-1</sup> at<br>1.0 A g <sup>-1</sup> | 5.10 Wh kg <sup>-1</sup> at<br>242.2 W kg <sup>-1</sup> | ~100% after<br>4250 cycles  | 104  |
| Nitrogen-doped HPCNFs          | PAN + ZIF-8 + DMF                                                                                | Organic template + Nitrogen doping           | S <sub>BET</sub> = 314.7 m <sup>2</sup> g <sup>-1</sup> ,<br>V <sub>total</sub> = 0.330 cm <sup>3</sup> g <sup>-1</sup>                                                                 | 1 M H <sub>2</sub> SO <sub>4</sub> | 332.0 F g <sup>-1</sup> at<br>1.0 A g <sup>-1</sup> | —                                                       | 98.9% after<br>5000 cycles  | 105  |
| Nitrogen-doped HPCNFs          | PAN + ZIF-8 + DMF                                                                                | Organic template + Nitrogen doping           | S <sub>BET</sub> = 559.6 m <sup>2</sup> g <sup>-1</sup> ,<br>V <sub>total</sub> = 0.789 cm <sup>3</sup> g <sup>-1</sup> ,<br>V <sub>micro</sub> = 0.137 cm <sup>3</sup> g <sup>-1</sup> | 6 M KOH                            | 302.0 F g <sup>-1</sup> at<br>0.5 A g <sup>-1</sup> | —                                                       | 84.0% after<br>12000 cycles | 106  |
| Boron/nitrogen co-doped PCNFs  | PAN/ZIF-8 fibers treated by NaBH <sub>4</sub> and NH <sub>4</sub> HB <sub>4</sub> O <sub>7</sub> | Organic template + Boron/nitrogen co-doping  | S <sub>BET</sub> = 351.5 m <sup>2</sup> g <sup>-1</sup> ,<br>V <sub>total</sub> = 1.789 cm <sup>3</sup> g <sup>-1</sup>                                                                 | 2 M KOH                            | 295.0 F g <sup>-1</sup> at<br>0.5 A g <sup>-1</sup> | —                                                       | 94.5% after<br>10000 cycles | 107  |
| Sulfur/nitrogen co-doped PCNFs | PAN + ZIF-67 + thiourea + DMF                                                                    | Organic template + Sulfur/nitrogen co-doping | S <sub>BET</sub> = 512.0 m <sup>2</sup> g <sup>-1</sup> ,<br>V <sub>micro</sub> = 0.220 cm <sup>3</sup> g <sup>-1</sup>                                                                 | 1 M H <sub>2</sub> SO <sub>4</sub> | 396.0 F g <sup>-1</sup> at<br>1.0 A g <sup>-1</sup> | 14.3 Wh kg <sup>-1</sup> at<br>250 W kg <sup>-1</sup>   | 107% after<br>3000 cycles   | 108  |



| Materials                                | Precursors and additives                                                                   | Activation methods                                             | Surface area, pores, and conductivity                                                                                                                                      | Electrolyte                 | Specific capacitance                             | Energy/Power density                               | Cyclic Stability         | Ref. |
|------------------------------------------|--------------------------------------------------------------------------------------------|----------------------------------------------------------------|----------------------------------------------------------------------------------------------------------------------------------------------------------------------------|-----------------------------|--------------------------------------------------|----------------------------------------------------|--------------------------|------|
| Nitrogen-doped HPCNFs                    | PAN nanofibers + ZIF-8 (polarity-assisted growth)                                          | Organic template + Nitrogen doping                             | $S_{\text{BET}} = 277.2 \text{ m}^2 \text{ g}^{-1}$                                                                                                                        | 1 M $\text{H}_2\text{SO}_4$ | 387.3 F $\text{g}^{-1}$ at 1.0 A $\text{g}^{-1}$ | 7.9 Wh $\text{kg}^{-1}$ at 219 W $\text{kg}^{-1}$  | 90.0% after 10000 cycles | 109  |
| PCNFs                                    | PAN/IAA/DMF (outer) + PAN/DMF (inner)                                                      | Organic template                                               | $S_{\text{BET}} = 563.0 \text{ m}^2 \text{ g}^{-1}$ ,<br>$V_{\text{micro}} = 0.240 \text{ cm}^3 \text{ g}^{-1}$                                                            | 1 M $\text{H}_2\text{SO}_4$ | 272.7 F $\text{g}^{-1}$ at 1.0 A $\text{g}^{-1}$ | 11.1 Wh $\text{kg}^{-1}$ at 250 W $\text{kg}^{-1}$ | 96.7% after 3000 cycles  | 110  |
| Nitrogen-doped PCNFs                     | PAN + PVP + DMF                                                                            | Organic template + Nitrogen doping                             | $S_{\text{BET}} = 452.5 \text{ m}^2 \text{ g}^{-1}$ ,<br>$V_{\text{total}} = 0.210 \text{ cm}^3 \text{ g}^{-1}$                                                            | 6 M KOH                     | 198.0 F $\text{g}^{-1}$ at 1.0 A $\text{g}^{-1}$ | —                                                  | 104.8% after 5000 cycles | 113  |
| Fluorine/nitrogen <i>co</i> -doped PCNFs | PAN/PVP fibers + water + Carbonization + Vacuum plasma treatment by $\text{C}_4\text{F}_8$ | Organic template + Fluorine/nitrogen <i>co</i> -doping         | $S_{\text{BET}} = 596.1 \text{ m}^2 \text{ g}^{-1}$                                                                                                                        | 1 M $\text{H}_2\text{SO}_4$ | 252.6 F $\text{g}^{-1}$ at 0.5 A $\text{g}^{-1}$ | 8.07 Wh $\text{kg}^{-1}$ at 248 W $\text{kg}^{-1}$ | 92.0% after 20000 cycles | 114  |
| PCNFs                                    | PAN/PVP fibers + water                                                                     | Organic template + Physical activation by $\text{CO}_2$        | $S_{\text{BET}} = 1232 \text{ m}^2 \text{ g}^{-1}$ ,<br>$V_{\text{total}} = 0.786 \text{ cm}^3 \text{ g}^{-1}$ ,<br>$V_{\text{micro}} = 0.441 \text{ cm}^3 \text{ g}^{-1}$ | 6 M KOH                     | 202.0 F $\text{g}^{-1}$ at 2 mV $\text{s}^{-1}$  | —                                                  | 100% after 10000 cycles  | 115  |
| Nitrogen-doped arch CNFs                 | PAN (outer)/PVP (inner) fibers + water                                                     | Organic template + Nitrogen doping                             | $S_{\text{BET}} = 619.0 \text{ m}^2 \text{ g}^{-1}$ ,<br>$V_{\text{total}} = 0.659 \text{ cm}^3 \text{ g}^{-1}$ ,<br>$\sigma = 4.50 \text{ S cm}^{-1}$                     | 1 M $\text{H}_2\text{SO}_4$ | 421.0 F $\text{g}^{-1}$ at 0.5 A $\text{g}^{-1}$ | 8.4 Wh $\text{kg}^{-1}$ at 50 W $\text{kg}^{-1}$   | 98.0% after 5000 cycles  | 117  |
| Microporous CNFs                         | PAN/PVP fibers + water                                                                     | Organic template                                               | —                                                                                                                                                                          | 2 M KOH                     | 200.0 F $\text{g}^{-1}$ at 0.5 A $\text{g}^{-1}$ | —                                                  | 93.0% after 1000 cycles  | 119  |
| Nitrogen-doped hollow CNFs               | PAN (outer)/PVP (inner) fibers + water                                                     | Organic template + Nitrogen doping by $\text{NH}_3$ activation | $S_{\text{BET}} = 701.0 \text{ m}^2 \text{ g}^{-1}$ ,<br>$V_{\text{total}} = 0.497 \text{ cm}^3 \text{ g}^{-1}$                                                            | 6 M KOH                     | 197.0 F $\text{g}^{-1}$ at 0.2 A $\text{g}^{-1}$ | —                                                  | 98.6% after 1000 cycles  | 120  |

| Materials                          | Precursors and additives                   | Activation methods                                      | Surface area, pores, and conductivity                                                                                                                                 | Electrolyte                 | Specific capacitance                                   | Energy/Power density                                 | Cyclic Stability                | Ref. |
|------------------------------------|--------------------------------------------|---------------------------------------------------------|-----------------------------------------------------------------------------------------------------------------------------------------------------------------------|-----------------------------|--------------------------------------------------------|------------------------------------------------------|---------------------------------|------|
| Mesoporous CNFs                    | PAN + PMMA + graphene + DMF                | Organic template + Integration with graphene            | $S_{\text{BET}} = 551.3 \text{ m}^2 \text{ g}^{-1}$ , $\sigma = 1.16 \text{ S cm}^{-1}$                                                                               | 6 M KOH                     | $\sim 160.0 \text{ F g}^{-1}$ at 1 mA $\text{cm}^{-2}$ | 21.4 Wh $\text{kg}^{-1}$ at 400 W $\text{kg}^{-1}$   | 83.0% after 100 cycles          | 121  |
| Hollow PCNFs                       | PAN/PMMA/DMF (outer) + PMMA/DMF (inner)    | Organic template + Chemical activation by KOH           | $S_{\text{BET}} = 1753.9 \text{ m}^2 \text{ g}^{-1}$ , $V_{\text{total}} = 2.150 \text{ cm}^3 \text{ g}^{-1}$                                                         | 6 M KOH                     | 191.3 F $\text{g}^{-1}$ at 2 mV $\text{s}^{-1}$        | —                                                    | 91.0% after 4000 cycles         | 122  |
| PCNFs                              | PAN + PMMA + DMF                           | Organic template                                        | $S_{\text{BET}} = 683.5 \text{ m}^2 \text{ g}^{-1}$ , $V_{\text{total}} = 0.241 \text{ cm}^3 \text{ g}^{-1}$                                                          | 6 M KOH                     | 140.8 F $\text{g}^{-1}$ at 0.5 A $\text{g}^{-1}$       | 19.5 Wh $\text{kg}^{-1}$ at 250 W $\text{kg}^{-1}$   | 95.4% after 10000 cycles        | 123  |
| PCNFs                              | PAN + PMMA + DMF                           | Organic template + Physical activation by $\text{CO}_2$ | $S_{\text{BET}} = 2419 \text{ m}^2 \text{ g}^{-1}$ , $V_{\text{total}} = 1.313 \text{ cm}^3 \text{ g}^{-1}$ , $V_{\text{micro}} = 0.638 \text{ cm}^3 \text{ g}^{-1}$  | EMITFSI ionic liquid        | 140.2 F $\text{g}^{-1}$ at 10 mV $\text{s}^{-1}$       | 67.4 Wh $\text{kg}^{-1}$ at 1715 W $\text{kg}^{-1}$  | 85.0% after 1000 cycles         | 124  |
| Ultrathin CNFs                     | PAN + PMMA + DMF                           | Organic template                                        | $S_{\text{BET}} = 620.0 \text{ m}^2 \text{ g}^{-1}$ , $V_{\text{total}} = 0.403 \text{ cm}^3 \text{ g}^{-1}$ , $V_{\text{micro}} = 0.217 \text{ cm}^3 \text{ g}^{-1}$ | 1 M $\text{H}_2\text{SO}_4$ | 243.0 F $\text{g}^{-1}$ at 1.0 A $\text{g}^{-1}$       | —                                                    | 100.5% after 1000 cycles        | 125  |
| Hollowed multi-channel CNFs        | PAN/l-PMMA/DMF (shell) + h-PMMA/DMF (core) | Organic template                                        | $S_{\text{BET}} = 549.2 \text{ m}^2 \text{ g}^{-1}$ , $V_{\text{total}} = 0.463 \text{ cm}^3 \text{ g}^{-1}$                                                          | 1 M $\text{H}_2\text{SO}_4$ | 129.0 F $\text{g}^{-1}$ at 2 mV $\text{s}^{-1}$        | —                                                    | $\sim 82.0\%$ after 1000 cycles | 126  |
| Multi-channel CNFs                 | PAN + PS + DMF                             | Organic template                                        | $S_{\text{BET}} = 750.0 \text{ m}^2 \text{ g}^{-1}$                                                                                                                   | 6 M KOH                     | 270.0 F $\text{g}^{-1}$ at 0.5 A $\text{g}^{-1}$       | 9.0 Wh $\text{kg}^{-1}$ at 120 W $\text{kg}^{-1}$    | $\sim 100\%$ after 5000 cycles  | 127  |
| Nitrogen-doped multi-channel PCNFs | PAN + PS + DMF                             | Organic template + Nitrogen doping                      | $S_{\text{BET}} = 840.8 \text{ m}^2 \text{ g}^{-1}$ , $V_{\text{total}} = 0.462 \text{ cm}^3 \text{ g}^{-1}$ , $V_{\text{micro}} = 0.250 \text{ cm}^3 \text{ g}^{-1}$ | 1 M $\text{H}_2\text{SO}_4$ | 461.0 F $\text{g}^{-1}$ at 0.25 A $\text{g}^{-1}$      | 11.2 Wh $\text{kg}^{-1}$ at 118.7 W $\text{kg}^{-1}$ | 92.6% after 50000 cycles        | 128  |

| Materials             | Precursors and additives | Activation methods                              | Surface area, pores, and conductivity                                                                                                                                        | Electrolyte          | Specific capacitance                               | Energy/Power density                               | Cyclic Stability         | Ref. |
|-----------------------|--------------------------|-------------------------------------------------|------------------------------------------------------------------------------------------------------------------------------------------------------------------------------|----------------------|----------------------------------------------------|----------------------------------------------------|--------------------------|------|
| Activated PCNFs       | PAN + CA + DMF           | Organic template + Physical activation by steam | $S_{\text{BET}} = 1160 \text{ m}^2 \text{ g}^{-1}$ ,<br>$V_{\text{total}} = 0.807 \text{ cm}^3 \text{ g}^{-1}$ ,<br>$\sigma = 7.50 \text{ S cm}^{-1}$                        | 6 M KOH              | 245.0 F $\text{g}^{-1}$ at 1 mA $\text{cm}^{-2}$   | —                                                  | 95.9% after 1000 cycles  | 130  |
| Interconnected PCNFs  | PAN + PSF + DMF          | Organic template                                | $S_{\text{BET}} = 687.0 \text{ m}^2 \text{ g}^{-1}$ ,<br>$V_{\text{total}} = 0.520 \text{ cm}^3 \text{ g}^{-1}$ ,<br>$\sigma = 13.85 \text{ S cm}^{-1}$                      | 6 M KOH              | 257.0 F $\text{g}^{-1}$ at 0.25 A $\text{g}^{-1}$  | 36.0 Wh $\text{kg}^{-1}$ at 125 W $\text{kg}^{-1}$ | 100% after 6000 cycles   | 131  |
| Nitrogen-doped PCNFs  | PAN + APEG + DMF         | Organic template + Nitrogen doping              | $S_{\text{BET}} = 753.0 \text{ m}^2 \text{ g}^{-1}$                                                                                                                          | 6 M KOH              | 302.0 F $\text{g}^{-1}$ at 0.2 A $\text{g}^{-1}$   | 10.5 Wh $\text{kg}^{-1}$ at 50 W $\text{kg}^{-1}$  | 94.6% after 2000 cycles  | 133  |
| PCNFs                 | PAN/DMF + pitch/THF      | Organic template                                | $S_{\text{BET}} = 966.3 \text{ m}^2 \text{ g}^{-1}$ ,<br>$V_{\text{total}} = 0.379 \text{ cm}^3 \text{ g}^{-1}$ ,<br>$\sigma = 3.96 \text{ S cm}^{-1}$                       | 6 M KOH              | 130.7 F $\text{g}^{-1}$ at 1 mA $\text{cm}^{-2}$   | 15.0 Wh $\text{kg}^{-1}$ at 400 W $\text{kg}^{-1}$ | —                        | 134  |
| Nitrogen-doped PCNFs  | PAN + PmAP + DMSO        | Organic template + Nitrogen doping              | $S_{\text{BET}} = 1031.4 \text{ m}^2 \text{ g}^{-1}$ ,<br>$V_{\text{total}} = 1.343 \text{ cm}^3 \text{ g}^{-1}$ ,<br>$V_{\text{micro}} = 0.708 \text{ cm}^3 \text{ g}^{-1}$ | 6 M KOH              | 347.5 F $\text{g}^{-1}$ at 0.5 mA $\text{cm}^{-2}$ | 12.1 Wh $\text{kg}^{-1}$ at 93 W $\text{kg}^{-1}$  | 90.5% after 10000 cycles | 135  |
| Activated PCNFs       | PAN + Nafion + DMF       | Organic template + Chemical activation by KOH   | $S_{\text{BET}} = 2282 \text{ m}^2 \text{ g}^{-1}$ ,<br>$V_{\text{total}} = 1.240 \text{ cm}^3 \text{ g}^{-1}$                                                               | Sol-gel/ionic liquid | 144.0 F $\text{g}^{-1}$ at 0.5 A $\text{g}^{-1}$   | 61.0 Wh $\text{kg}^{-1}$ (5 mV $\text{s}^{-1}$ )   | —                        | 137  |
| Microporous CNFs      | PVP + PMDA + ODA + DMF   | Organic template                                | $S_{\text{BET}} = 804.0 \text{ m}^2 \text{ g}^{-1}$ ,<br>$V_{\text{total}} = 0.344 \text{ cm}^3 \text{ g}^{-1}$                                                              | 6 M KOH              | 215.0 F $\text{g}^{-1}$ at 0.2 A $\text{g}^{-1}$   | 7.5 Wh $\text{kg}^{-1}$ at 50 W $\text{kg}^{-1}$   | 92.0% after 1000 cycles  | 139  |
| Nitrogen-doped HPCNFs | PAN + PMMA + TPU + DMF   | Organic template + Nitrogen doping              | $S_{\text{BET}} = 2216.8 \text{ m}^2 \text{ g}^{-1}$ ,<br>$V_{\text{total}} = 1.443 \text{ cm}^3 \text{ g}^{-1}$                                                             | 6 M KOH              | 255.0 F $\text{g}^{-1}$ at 0.2 A $\text{g}^{-1}$   | —                                                  | ~100% after 8000 cycles  | 140  |

| Materials        | Precursors and additives                                      | Activation methods                            | Surface area, pores, and conductivity                                                                                                                                       | Electrolyte                            | Specific capacitance                                | Energy/Power density                                   | Cyclic Stability            | Ref. |
|------------------|---------------------------------------------------------------|-----------------------------------------------|-----------------------------------------------------------------------------------------------------------------------------------------------------------------------------|----------------------------------------|-----------------------------------------------------|--------------------------------------------------------|-----------------------------|------|
| Mesoporous CNFs  | PAN + PAA- <i>b</i> -PAN- <i>b</i> -PAA + DMAc                | Organic template                              | $S_{\text{BET}} = 249.8 \text{ m}^2 \text{ g}^{-1}$ ,<br>$V_{\text{total}} = 0.186 \text{ cm}^3 \text{ g}^{-1}$ ,<br>$V_{\text{micro}} = 0.097 \text{ cm}^3 \text{ g}^{-1}$ | 4 M KOH                                | 256.3 F $\text{g}^{-1}$ at<br>0.5 A $\text{g}^{-1}$ | 3.1 Wh $\text{kg}^{-1}$ at<br>~250 W $\text{kg}^{-1}$  | 90.0% after<br>80000 cycles | 141  |
| Mesoporous CNFs  | PAN + poly(ST- <i>co</i> -DVB- <i>co</i> -NaSS) +NWCNTs + DMF | Organic template + Integration with CNTs      | $S_{\text{BET}} = 535.0 \text{ m}^2 \text{ g}^{-1}$ ,<br>$V_{\text{total}} = 0.437 \text{ cm}^3 \text{ g}^{-1}$ ,<br>$\sigma = 2.36 \text{ S cm}^{-1}$                      | 1 M H <sub>2</sub> SO <sub>4</sub>     | 262.0 F $\text{g}^{-1}$ at<br>0.2 A $\text{g}^{-1}$ | —                                                      | —                           | 142  |
| PCNFs            | PAN + POSS + DMF                                              | Organic template + Chemical activation by KOH | $S_{\text{BET}} = 335.4 \text{ m}^2 \text{ g}^{-1}$ ,<br>$V_{\text{total}} = 0.330 \text{ cm}^3 \text{ g}^{-1}$ ,<br>$V_{\text{micro}} = 0.040 \text{ cm}^3 \text{ g}^{-1}$ | PVA/H <sub>3</sub> PO <sub>4</sub> gel | 138.7 F $\text{g}^{-1}$ at<br>0.2 A $\text{g}^{-1}$ | 12.2 Wh $\text{kg}^{-1}$ at<br>79.6 W $\text{kg}^{-1}$ | ~100% after<br>1000 cycles  | 143  |
| PCNFs            | PAN + lignin + DMF                                            | Organic template                              | $S_{\text{BET}} = 675.0 \text{ m}^2 \text{ g}^{-1}$ ,<br>$V_{\text{total}} = 0.290 \text{ cm}^3 \text{ g}^{-1}$ ,<br>$V_{\text{micro}} = 0.240 \text{ cm}^3 \text{ g}^{-1}$ | 6 M KOH                                | 216.8 F $\text{g}^{-1}$ at<br>1.0 A $\text{g}^{-1}$ | —                                                      | 88.8% after<br>2000 cycles  | 144  |
| Microporous CNFs | Phenolic resin/PVA + KOH + H <sub>2</sub> O                   | Organic template + Chemical activation by KOH | $S_{\text{BET}} = 597.0 \text{ m}^2 \text{ g}^{-1}$ ,<br>$V_{\text{total}} = 0.270 \text{ cm}^3 \text{ g}^{-1}$ ,<br>$V_{\text{micro}} = 0.260 \text{ cm}^3 \text{ g}^{-1}$ | 6 M KOH                                | 256.0 F $\text{g}^{-1}$ at<br>0.2 A $\text{g}^{-1}$ | —                                                      | 95.0% after<br>1000 cycles  | 145  |
| PCNFs            | Lignin + PVA + H <sub>2</sub> O                               | Organic template                              | $S_{\text{BET}} = 583.0 \text{ m}^2 \text{ g}^{-1}$ ,<br>$V_{\text{total}} = 0.289 \text{ cm}^3 \text{ g}^{-1}$                                                             | 6 M KOH                                | 64.0 F $\text{g}^{-1}$ at 0.4<br>A $\text{g}^{-1}$  | 5.67 Wh $\text{kg}^{-1}$ at<br>94.2 W $\text{kg}^{-1}$ | 90.0% after<br>6000 cycles  | 146  |
| PCNFs            | Acid treated coal + PVA + SDBS +H <sub>2</sub> O              | Organic template                              | $S_{\text{BET}} = 691.0 \text{ m}^2 \text{ g}^{-1}$ ,<br>$V_{\text{total}} = 0.526 \text{ cm}^3 \text{ g}^{-1}$ ,<br>$V_{\text{micro}} = 0.226 \text{ cm}^3 \text{ g}^{-1}$ | 6 M KOH                                | 170.0 F $\text{g}^{-1}$ at<br>1.0 A $\text{g}^{-1}$ | —                                                      | ~105% after<br>20000 cycles | 147  |

| Materials           | Precursors and additives                  | Activation methods                             | Surface area, pores, and conductivity                                                                                                                                       | Electrolyte                 | Specific capacitance                                 | Energy/Power density                                    | Cyclic Stability            | Ref. |
|---------------------|-------------------------------------------|------------------------------------------------|-----------------------------------------------------------------------------------------------------------------------------------------------------------------------------|-----------------------------|------------------------------------------------------|---------------------------------------------------------|-----------------------------|------|
| Hollow CNFs         | PAN/PMMA/DMF (shell) + PMMA/DMF (core)    | Organic template                               | $S_{\text{BET}} = 812.6 \text{ m}^2 \text{ g}^{-1}$ ,<br>$V_{\text{total}} = 0.946 \text{ cm}^3 \text{ g}^{-1}$ ,<br>$V_{\text{micro}} = 0.282 \text{ cm}^3 \text{ g}^{-1}$ | 6 M KOH                     | 192.0 F $\text{g}^{-1}$ at<br>0.5 A $\text{g}^{-1}$  | 26.7 Wh $\text{kg}^{-1}$ at<br>249.9 W $\text{kg}^{-1}$ | ~80.0% after<br>3000 cycles | 148  |
| PCNFs               | PBI + PLLA + DMAc + NMP                   | Organic template + Activation by $\text{NH}_3$ | $S_{\text{BET}} = 1114 \text{ m}^2 \text{ g}^{-1}$ ,<br>$V_{\text{total}} = 0.606 \text{ cm}^3 \text{ g}^{-1}$ ,<br>$V_{\text{micro}} = 0.443 \text{ cm}^3 \text{ g}^{-1}$  | EMITFSI<br>ionic liquid     | 111.9 F $\text{g}^{-1}$                              | 36.9 Wh $\text{kg}^{-1}$ at<br>700 W $\text{kg}^{-1}$   | —                           | 149  |
| PCNFs               | PAN + high-amylose starch + DMSO          | Organic template                               | $S_{\text{BET}} = 637.0 \text{ m}^2 \text{ g}^{-1}$ ,<br>$V_{\text{total}} = 0.420 \text{ cm}^3 \text{ g}^{-1}$ ,<br>$\sigma = 9.32 \text{ S cm}^{-1}$                      | 6 M KOH                     | 282.0 F $\text{g}^{-1}$ at<br>1.0 A $\text{g}^{-1}$  | 9.1 Wh $\text{kg}^{-1}$                                 | ~100% after<br>10000 cycles | 151  |
| Hollow PCNFs        | PMDA/ODA/PVP/DMF (shell) + SAN/DMF (core) | Organic template                               | —                                                                                                                                                                           | 6 M KOH                     | 221.0 F $\text{g}^{-1}$ at<br>0.2 A $\text{g}^{-1}$  | —                                                       | 95.0% after<br>5000 cycles  | 152  |
| Cross-linked HPCNFs | PAN + TPA + DMF                           | Organic template                               | $S_{\text{BET}} = 1144 \text{ m}^2 \text{ g}^{-1}$                                                                                                                          | 1 M $\text{H}_2\text{SO}_4$ | 257.6 F $\text{g}^{-1}$ at<br>0.5 A $\text{g}^{-1}$  | 10.18 Wh $\text{kg}^{-1}$                               | 95.0% after<br>20000 cycles | 153  |
| Cross-linked PCNFs  | PAN + melamine + DMF                      | Organic template                               | $S_{\text{BET}} = 428.0 \text{ m}^2 \text{ g}^{-1}$                                                                                                                         | 6 M KOH                     | 194.0 F $\text{g}^{-1}$ at<br>0.05 A $\text{g}^{-1}$ | —                                                       | 99.2% after<br>1000 cycles  | 154  |
| PCNFs               | P(AN-co-IA) + DMF                         | Organic template                               | $S_{\text{BET}} = 1427 \text{ m}^2 \text{ g}^{-1}$ ,<br>$V_{\text{total}} = 0.782 \text{ cm}^3 \text{ g}^{-1}$ ,<br>$V_{\text{micro}} = 0.442 \text{ cm}^3 \text{ g}^{-1}$  | EMITFSI<br>ionic liquid     | 92.9 F $\text{g}^{-1}$ at 10<br>mV $\text{s}^{-1}$   | 45.9 Wh $\text{kg}^{-1}$ at<br>1700 W $\text{kg}^{-1}$  | 77.0% after<br>2500 cycles  | 155  |
| Cross-linked NCNFs  | PAN + PVP + TPA + DMF                     | Organic template + Nitrogen doping             | $S_{\text{BET}} = 582.0 \text{ m}^2 \text{ g}^{-1}$ , $\sigma = 19.0 \text{ S cm}^{-1}$                                                                                     | 1 M $\text{H}_2\text{SO}_4$ | 223.8 F $\text{g}^{-1}$ at<br>0.5 A $\text{g}^{-1}$  | 5.9 Wh $\text{kg}^{-1}$ at<br>1200 W $\text{kg}^{-1}$   | 106% after<br>20000 cycles  | 156  |

| Materials              | Precursors and additives                                                    | Activation methods                                      | Surface area, pores, and conductivity                                                                                                                                                                             | Electrolyte                 | Specific capacitance                                | Energy/Power density                                      | Cyclic Stability            | Ref. |
|------------------------|-----------------------------------------------------------------------------|---------------------------------------------------------|-------------------------------------------------------------------------------------------------------------------------------------------------------------------------------------------------------------------|-----------------------------|-----------------------------------------------------|-----------------------------------------------------------|-----------------------------|------|
| Ultrafine hollow PCNFs | PAN/PVP (shell)/silicone oil (core) fibers + water                          | Organic template + Chemical activation by KOH           | $S_{\text{BET}} = 1120.3 \text{ m}^2 \text{ g}^{-1}$ ,<br>$V_{\text{total}} = 0.307 \text{ cm}^3 \text{ g}^{-1}$                                                                                                  | Organic electrolyte         | 231.6 F $\text{g}^{-1}$                             | 11.2 Wh $\text{kg}^{-1}$ at<br>15131.2 W $\text{kg}^{-1}$ | —                           | 157  |
| Mesoporous CNFs        | Phenolic resin + pluronic F127 + $\text{Mg}(\text{NO}_3)_2$ + PVP + ethanol | Inorganic and organic template                          | $S_{\text{BET}} = 674.0 \text{ m}^2 \text{ g}^{-1}$ ,<br>$V_{\text{total}} = 0.880 \text{ cm}^3 \text{ g}^{-1}$ ,<br>$V_{\text{micro}} = 0.045 \text{ cm}^3 \text{ g}^{-1}$ ,<br>$\sigma = 1.2 \text{ S cm}^{-1}$ | 6 M KOH                     | 270.0 F $\text{g}^{-1}$ at<br>0.2 A $\text{g}^{-1}$ | —                                                         | 95.0% after<br>5000 cycles  | 158  |
| PCNFs                  | PBI + 6FDD + DMAc                                                           | Organic template + Physical activation by $\text{CO}_2$ | $S_{\text{BET}} = 3010 \text{ m}^2 \text{ g}^{-1}$ ,<br>$V_{\text{total}} = 1.608 \text{ cm}^3 \text{ g}^{-1}$ ,<br>$V_{\text{micro}} = 0.921 \text{ cm}^3 \text{ g}^{-1}$                                        | Ionic liquid                | 142.8 F $\text{g}^{-1}$ at 10<br>mV $\text{s}^{-1}$ | 67.5 Wh $\text{kg}^{-1}$ at<br>1713.8 W $\text{kg}^{-1}$  | 86.3% after<br>1000 cycles  | 162  |
| Interconnected CNFs    | PAN + oxidized coal + DMF                                                   | Organic template + Physical activation by $\text{CO}_2$ | $S_{\text{BET}} = 877.0 \text{ m}^2 \text{ g}^{-1}$ ,<br>$V_{\text{total}} = 0.354 \text{ cm}^3 \text{ g}^{-1}$ ,<br>$V_{\text{micro}} = 0.308 \text{ cm}^3 \text{ g}^{-1}$                                       | 6 M KOH                     | 259.7 F $\text{g}^{-1}$ at<br>1.0 A $\text{g}^{-1}$ | —                                                         | 135.5% after<br>7000 cycles | 163  |
| Mesoporous CNFs        | PAN + lignin + DMF                                                          | Organic template + Physical activation by $\text{CO}_2$ | $S_{\text{BET}} = 2543 \text{ m}^2 \text{ g}^{-1}$ ,<br>$V_{\text{micro}} = 0.547 \text{ cm}^3 \text{ g}^{-1}$ ,<br>$\sigma = 5.3 \text{ S cm}^{-1}$                                                              | Ionic liquid                | 128.0 F $\text{g}^{-1}$ at 10<br>mV $\text{s}^{-1}$ | 50.0 Wh $\text{kg}^{-1}$ at<br>15000 W $\text{kg}^{-1}$   | 75.0% after<br>1000 cycles  | 164  |
| Inter-bonded CNFs      | CA nanofibers + hydrolysis                                                  | Physical activation by $\text{CO}_2$                    | $S_{\text{BET}} = 520.0 \text{ m}^2 \text{ g}^{-1}$ ,<br>$V_{\text{total}} = 0.300 \text{ cm}^3 \text{ g}^{-1}$                                                                                                   | 6 M KOH                     | 241.4 F $\text{g}^{-1}$ at<br>1.0 A $\text{g}^{-1}$ | 4.2 Wh $\text{kg}^{-1}$ at<br>12500 W $\text{kg}^{-1}$    | 99.9% after<br>10000 cycles | 165  |
| Aligned ACNFs          | PAN + DMF                                                                   | Physical activation by $\text{CO}_2$                    | $S_{\text{BET}} = 1097 \text{ m}^2 \text{ g}^{-1}$ ,<br>$V_{\text{total}} = 0.620 \text{ cm}^3 \text{ g}^{-1}$ ,<br>$V_{\text{micro}} = 0.240 \text{ cm}^3 \text{ g}^{-1}$ ,<br>$\sigma = 1.42 \text{ S cm}^{-1}$ | 1 M $\text{H}_2\text{SO}_4$ | 230.0 F $\text{g}^{-1}$ at 10<br>mV $\text{s}^{-1}$ | —                                                         | 96.5% after<br>1000 cycles  | 167  |

| Materials          | Precursors and additives                             | Activation methods                                 | Surface area, pores, and conductivity                                                                                                                                       | Electrolyte                  | Specific capacitance                                 | Energy/Power density                                   | Cyclic Stability           | Ref. |
|--------------------|------------------------------------------------------|----------------------------------------------------|-----------------------------------------------------------------------------------------------------------------------------------------------------------------------------|------------------------------|------------------------------------------------------|--------------------------------------------------------|----------------------------|------|
| ACNFs              | PAN + DMF                                            | Physical activation by steam                       | $S_{\text{BET}} = 1230 \text{ m}^2 \text{ g}^{-1}$ ,<br>$V_{\text{total}} = 0.550 \text{ cm}^3 \text{ g}^{-1}$                                                              | 30 wt.% KOH                  | 173.0 F $\text{g}^{-1}$ at<br>0.01 A $\text{g}^{-1}$ | —                                                      | —                          | 168  |
| ACNFs              | PBI + DMAc                                           | Physical activation by steam                       | $S_{\text{BET}} = 1220 \text{ m}^2 \text{ g}^{-1}$ ,<br>$V_{\text{micro}} = 0.710 \text{ cm}^3 \text{ g}^{-1}$                                                              | 1 M $\text{H}_2\text{SO}_4$  | 202.0 F $\text{g}^{-1}$ at 1<br>mA $\text{cm}^{-2}$  | —                                                      | —                          | 169  |
| ACNFs              | PMDA + ODA + THF +<br>methanol                       | Physical activation by steam                       | $S_{\text{BET}} = 1453 \text{ m}^2 \text{ g}^{-1}$ ,<br>$V_{\text{micro}} = 0.563 \text{ cm}^3 \text{ g}^{-1}$                                                              | 30 wt.% KOH                  | 175.0 F $\text{g}^{-1}$ at<br>0.02 A $\text{g}^{-1}$ | —                                                      | —                          | 172  |
| ACNFs              | PIM-1 + tetrachloroethane                            | Physical activation by steam                       | $S_{\text{BET}} = 1162 \text{ m}^2 \text{ g}^{-1}$ ,<br>$V_{\text{total}} = 0.611 \text{ cm}^3 \text{ g}^{-1}$ ,<br>$V_{\text{micro}} = 0.469 \text{ cm}^3 \text{ g}^{-1}$  | Ionic liquid                 | 149.0 F $\text{g}^{-1}$ at<br>1.0 A $\text{g}^{-1}$  | 60.0 Wh $\text{kg}^{-1}$ at<br>1715 W $\text{kg}^{-1}$ | —                          | 173  |
| ACNFs              | PAN + acid treated coal +<br>DMF                     | Organic template + Physical<br>activation by steam | $S_{\text{BET}} = 902.0 \text{ m}^2 \text{ g}^{-1}$ ,<br>$V_{\text{total}} = 0.405 \text{ cm}^3 \text{ g}^{-1}$ ,<br>$V_{\text{micro}} = 0.352 \text{ cm}^3 \text{ g}^{-1}$ | 6 M KOH                      | 230.0 F $\text{g}^{-1}$ at<br>1.0 A $\text{g}^{-1}$  | —                                                      | 97.0% after<br>1000 cycles | 174  |
| Activated<br>PCNFs | PAN + DMF                                            | Chemical activation by KOH                         | $S_{\text{BET}} = 1886 \text{ m}^2 \text{ g}^{-1}$ ,<br>$V_{\text{total}} = 1.196 \text{ cm}^3 \text{ g}^{-1}$ ,<br>$V_{\text{micro}} = 0.940 \text{ cm}^3 \text{ g}^{-1}$  | 1 M $\text{Na}_2\text{SO}_4$ | 103.0 F $\text{g}^{-1}$ at<br>1.0 A $\text{g}^{-1}$  | —                                                      | 94.0% after<br>3000 cycles | 177  |
| CNF aerogels       | Pre-oxidized PAN fibers +<br>PAA-TEA (freeze-drying) | Organic template + Chemical<br>activation by KOH   | —                                                                                                                                                                           | 6 M KOH                      | 307.2 F $\text{g}^{-1}$ at 2<br>mV $\text{s}^{-1}$   | —                                                      | 96.3% after<br>5000 cycles | 178  |
| Activated<br>PCNFs | Phenolic resin + PVA +<br>$\text{H}_2\text{O}$       | Organic template + Chemical<br>activation by KOH   | $S_{\text{BET}} = 1317 \text{ m}^2 \text{ g}^{-1}$ ,<br>$V_{\text{total}} = 0.699 \text{ cm}^3 \text{ g}^{-1}$ ,<br>$V_{\text{micro}} = 0.540 \text{ cm}^3 \text{ g}^{-1}$  | 6 M KOH                      | 362.0 F $\text{g}^{-1}$ at<br>0.2 A $\text{g}^{-1}$  | 7.1 Wh $\text{kg}^{-1}$ at<br>90 W $\text{kg}^{-1}$    | 98.0% after<br>1000 cycles | 179  |

| Materials            | Precursors and additives                           | Activation methods                                           | Surface area, pores, and conductivity                                                                                                                                                   | Electrolyte                         | Specific capacitance                             | Energy/Power density                                | Cyclic Stability         | Ref. |
|----------------------|----------------------------------------------------|--------------------------------------------------------------|-----------------------------------------------------------------------------------------------------------------------------------------------------------------------------------------|-------------------------------------|--------------------------------------------------|-----------------------------------------------------|--------------------------|------|
| ACNFs                | PAN + carbonized wheat straw + DMF                 | Integration with biomass carbon + Chemical activation by KOH | —                                                                                                                                                                                       | 6 M KOH                             | 249.0 F g <sup>-1</sup> at 0.4 A g <sup>-1</sup> | —                                                   | 96.4% after 1000 cycles  | 180  |
| ACNFs                | PAN + H <sub>3</sub> PO <sub>4</sub> + DMF         | Chemical activation by H <sub>3</sub> PO <sub>4</sub>        | S <sub>BET</sub> = 709.0 m <sup>2</sup> g <sup>-1</sup> ,<br>V <sub>total</sub> = 0.356 cm <sup>3</sup> g <sup>-1</sup> ,<br>V <sub>micro</sub> = 0.278 cm <sup>3</sup> g <sup>-1</sup> | 6 M KOH                             | 156.0 F g <sup>-1</sup> at 0.5 A g <sup>-1</sup> | 21.46 Wh kg <sup>-1</sup> at 500 W kg <sup>-1</sup> | 96.5% after 1000 cycles  | 181  |
| Activated PCNFs      | CA + DMAc + acetone                                | Chemical activation by ZnCl <sub>2</sub>                     | S <sub>BET</sub> = 1188 m <sup>2</sup> g <sup>-1</sup> ,<br>V <sub>total</sub> = 0.575 cm <sup>3</sup> g <sup>-1</sup> ,<br>V <sub>micro</sub> = 0.406 cm <sup>3</sup> g <sup>-1</sup>  | 6 M KOH                             | 202.0 F g <sup>-1</sup> at 0.1 A g <sup>-1</sup> | —                                                   | 92.0% after 5000 cycles  | 182  |
| NCNFs                | PVP-derived CNFs + g-C <sub>3</sub> N <sub>4</sub> | Nitrogen doping                                              | S <sub>BET</sub> = 309.0 m <sup>2</sup> g <sup>-1</sup>                                                                                                                                 | 1 M H <sub>2</sub> SO <sub>4</sub>  | 264.4 F g <sup>-1</sup> at 1.0 A g <sup>-1</sup> | —                                                   | >100% after 5000 cycles  | 192  |
| Mesoporous NCNFs     | PAN + g-C <sub>3</sub> N <sub>4</sub> + DMF        | Nitrogen doping + Physical activation by steam               | S <sub>BET</sub> = 554.0 m <sup>2</sup> g <sup>-1</sup> ,<br>V <sub>total</sub> = 0.900 cm <sup>3</sup> g <sup>-1</sup>                                                                 | 2 M Li <sub>2</sub> SO <sub>4</sub> | 220.0 F g <sup>-1</sup> at 0.2 A g <sup>-1</sup> | 12.5 Wh kg <sup>-1</sup> at 72 W kg <sup>-1</sup>   | 97.0% after 1000 cycles  | 193  |
| NCNFs                | Regenerated cellulose fibers + NH <sub>4</sub> Cl  | Nitrogen doping                                              | S <sub>BET</sub> = 29.0 m <sup>2</sup> g <sup>-1</sup> , σ = 10.2 S cm <sup>-1</sup>                                                                                                    | 1 M KOH                             | 26.0 F g <sup>-1</sup>                           | —                                                   | 138.3% after 1000 cycles | 195  |
| NCNFs                | Regenerated cellulose fibers + PPy coating         | Nitrogen doping + Physical activation by CO <sub>2</sub>     | S <sub>BET</sub> = 281.8 m <sup>2</sup> g <sup>-1</sup> ,<br>V <sub>total</sub> = 0.187 cm <sup>3</sup> g <sup>-1</sup>                                                                 | 6 M KOH                             | 236.0 F g <sup>-1</sup> at 0.2 A g <sup>-1</sup> | —                                                   | 98.0% after 10000 cycles | 197  |
| Nitrogen-doped PCNFs | PAN fibers + PANi coating                          | Nitrogen doping                                              | S <sub>BET</sub> = 410.0 m <sup>2</sup> g <sup>-1</sup> ,<br>V <sub>total</sub> = 0.209 cm <sup>3</sup> g <sup>-1</sup>                                                                 | 1 M H <sub>2</sub> SO <sub>4</sub>  | 335.0 F g <sup>-1</sup> at 0.5 A g <sup>-1</sup> | 9.2 Wh kg <sup>-1</sup> at 250 W kg <sup>-1</sup>   | 86.0% after 10000 cycles | 198  |
| NCNFs                | PAN fibers + bPEI coating                          | Nitrogen doping                                              | —                                                                                                                                                                                       | 3 M KOH                             | 192.5 F g <sup>-1</sup> at 1.0 A g <sup>-1</sup> | 8.0 Wh kg <sup>-1</sup> at 300 W kg <sup>-1</sup>   | 84.5% after 1000 cycles  | 200  |



| Materials                      | Precursors and additives                                    | Activation methods                           | Surface area, pores, and conductivity                                                                                                                                                                                     | Electrolyte                         | Specific capacitance                             | Energy/Power density                                 | Cyclic Stability         | Ref. |
|--------------------------------|-------------------------------------------------------------|----------------------------------------------|---------------------------------------------------------------------------------------------------------------------------------------------------------------------------------------------------------------------------|-------------------------------------|--------------------------------------------------|------------------------------------------------------|--------------------------|------|
| NCNFs                          | Pre-oxidized PAN fibers (carbonization in NH <sub>3</sub> ) | Nitrogen doping                              | —                                                                                                                                                                                                                         | 1 M Na <sub>2</sub> SO <sub>4</sub> | —                                                | 29.1 Wh kg <sup>-1</sup> at 450 W kg <sup>-1</sup>   | 93.7% after 5000 cycles  | 201  |
| NCNFs                          | Phenolic resin/PVA-derived CNFs (NH <sub>3</sub> treatment) | Organic template + Nitrogen doping           | S <sub>BET</sub> = 763.0 m <sup>2</sup> g <sup>-1</sup> ,<br>V <sub>total</sub> = 0.360 cm <sup>3</sup> g <sup>-1</sup> ,<br>V <sub>micro</sub> = 0.280 cm <sup>3</sup> g <sup>-1</sup> ,<br>σ = 0.833 S cm <sup>-1</sup> | 6 M KOH                             | 251.2 F g <sup>-1</sup> at 0.1 A g <sup>-1</sup> | 21.7 Wh kg <sup>-1</sup> at 10000 W kg <sup>-1</sup> | 99.0% after 2000 cycles  | 203  |
| Boron/nitrogen co-doped PCNFs  | PAN + H <sub>3</sub> BO <sub>3</sub> + urea + DMF           | Boron/nitrogen co-doping                     | S <sub>BET</sub> = 560.0 m <sup>2</sup> g <sup>-1</sup> ,<br>V <sub>total</sub> = 0.270 cm <sup>3</sup> g <sup>-1</sup> ,<br>V <sub>micro</sub> = 0.186 cm <sup>3</sup> g <sup>-1</sup>                                   | 6 M KOH                             | 180.0 F g <sup>-1</sup> at 1 mA cm <sup>-2</sup> | 23.5 Wh kg <sup>-1</sup> at 400 W kg <sup>-1</sup>   | —                        | 207  |
| Oxygen/nitrogen co-doped PCNFs | PAN/PVP fibers + water (HNO <sub>3</sub> activation)        | Organic template + Oxygen/nitrogen co-doping | S <sub>BET</sub> = 692.0 m <sup>2</sup> g <sup>-1</sup> ,<br>V <sub>total</sub> = 0.450 cm <sup>3</sup> g <sup>-1</sup> ,<br>V <sub>micro</sub> = 0.252 cm <sup>3</sup> g <sup>-1</sup>                                   | 6 M KOH                             | 207.0 F g <sup>-1</sup> at 0.2 A g <sup>-1</sup> | 24.8 Wh kg <sup>-1</sup> at 349 W kg <sup>-1</sup>   | 91.0% after 3000 cycles  | 208  |
| Oxygen/nitrogen co-doped CNFs  | PAN + DMF (HNO <sub>3</sub> oxidation)                      | Oxygen/nitrogen co-doping                    | S <sub>BET</sub> = 165.0 m <sup>2</sup> g <sup>-1</sup> ,<br>V <sub>total</sub> = 0.117 cm <sup>3</sup> g <sup>-1</sup> ,<br>V <sub>micro</sub> = 0.073 cm <sup>3</sup> g <sup>-1</sup>                                   | 2 M KOH                             | 365.0 F g <sup>-1</sup> at 2 mV s <sup>-1</sup>  | —                                                    | ~100% after 2000 cycles  | 209  |
| Oxygen/nitrogen co-doped CNFs  | PAN + DMF (microwave-assisted oxidation)                    | Oxygen/nitrogen co-doping                    | S <sub>BET</sub> = 670.0 m <sup>2</sup> g <sup>-1</sup> ,<br>V <sub>total</sub> = 0.534 cm <sup>3</sup> g <sup>-1</sup> ,<br>V <sub>micro</sub> = 0.397 cm <sup>3</sup> g <sup>-1</sup>                                   | 1 M H <sub>2</sub> SO <sub>4</sub>  | 338.0 F g <sup>-1</sup> at 1.0 A g <sup>-1</sup> | 46.9 Wh kg <sup>-1</sup> at 10000 W kg <sup>-1</sup> | 98.0% after 10000 cycles | 210  |
| Oxygen/nitrogen co-doped CNFs  | PAN + DMF (plasma oxidation)                                | Oxygen/nitrogen co-doping                    | S <sub>BET</sub> = 274.0 m <sup>2</sup> g <sup>-1</sup> ,<br>V <sub>total</sub> = 0.181 cm <sup>3</sup> g <sup>-1</sup> ,<br>V <sub>micro</sub> = 0.099 cm <sup>3</sup> g <sup>-1</sup>                                   | 2 M KOH                             | 377.0 F g <sup>-1</sup> at 2 mV s <sup>-1</sup>  | —                                                    | ~120% after 2000 cycles  | 212  |

| Materials                             | Precursors and additives                                                                          | Activation methods                                                                                            | Surface area, pores, and conductivity                                                                                                                                                                                    | Electrolyte                        | Specific capacitance                             | Energy/Power density                                 | Cyclic Stability         | Ref. |
|---------------------------------------|---------------------------------------------------------------------------------------------------|---------------------------------------------------------------------------------------------------------------|--------------------------------------------------------------------------------------------------------------------------------------------------------------------------------------------------------------------------|------------------------------------|--------------------------------------------------|------------------------------------------------------|--------------------------|------|
| N/P <i>co</i> -doped CNFs             | PAN + H <sub>3</sub> PO <sub>4</sub> + DMF                                                        | Phosphorus/nitrogen <i>co</i> -doping                                                                         | S <sub>BET</sub> = 12.15 m <sup>2</sup> g <sup>-1</sup>                                                                                                                                                                  | 1 M H <sub>2</sub> SO <sub>4</sub> | 224.9 F g <sup>-1</sup> at 0.5 A g <sup>-1</sup> | —                                                    | 105.2% after 8000 cycles | 216  |
| N/P <i>co</i> -doped CNFs             | PAN + PEG + PPA + DMF                                                                             | Organic template + Phosphorus/nitrogen <i>co</i> -doping                                                      | S <sub>BET</sub> = 462.8 m <sup>2</sup> g <sup>-1</sup> ,<br>V <sub>total</sub> = 0.250 cm <sup>3</sup> g <sup>-1</sup> ,<br>V <sub>micro</sub> = 0.150 cm <sup>3</sup> g <sup>-1</sup>                                  | 1 M H <sub>2</sub> SO <sub>4</sub> | 228.7 F g <sup>-1</sup> at 0.5 A g <sup>-1</sup> | —                                                    | 107.5% after 5000 cycles | 217  |
| Sulfur/nitrogen <i>co</i> -doped CNFs | PAN + lignin + graphene + DMF                                                                     | Organic template + Integration with graphene + Sulfur/nitrogen <i>co</i> -doping + Chemical activation by KOH | S <sub>BET</sub> = 2439 m <sup>2</sup> g <sup>-1</sup> ,<br>V <sub>total</sub> = 1.288 cm <sup>3</sup> g <sup>-1</sup>                                                                                                   | 6 M KOH                            | 267.3 F g <sup>-1</sup> at 5 mV s <sup>-1</sup>  | 9.28 Wh kg <sup>-1</sup> at 493 W kg <sup>-1</sup>   | 96.7% after 5000 cycles  | 220  |
| B-F-N triply doped PCNFs              | PVA + PTFE + H <sub>3</sub> BO <sub>3</sub> + H <sub>2</sub> O (carbonization in N <sub>2</sub> ) | Boron/fluorine/nitrogen <i>co</i> -doping + Organic template                                                  | S <sub>BET</sub> = 633.6 m <sup>2</sup> g <sup>-1</sup> ,<br>V <sub>total</sub> = 0.540 cm <sup>3</sup> g <sup>-1</sup>                                                                                                  | 1 M LiPF <sub>6</sub>              | 163.6 F g <sup>-1</sup> at 5 mV s <sup>-1</sup>  | 42.77 Wh kg <sup>-1</sup> at 1750 W kg <sup>-1</sup> | 88.5% after 9000 cycles  | 223  |
| Reinforced CNFs                       | PAN + graphene QDs + DMF                                                                          | Integration with graphene + Chemical activation by KOH                                                        | S <sub>BET</sub> = 2032 m <sup>2</sup> g <sup>-1</sup> ,<br>V <sub>total</sub> = 1.091 cm <sup>3</sup> g <sup>-1</sup> ,<br>V <sub>micro</sub> = 0.550 cm <sup>3</sup> g <sup>-1</sup> ,<br>σ = 0.650 S cm <sup>-1</sup> | 6 M KOH                            | 358.4 F g <sup>-1</sup> at 1.0 A g <sup>-1</sup> | 3.73 Wh kg <sup>-1</sup> at 34020 W kg <sup>-1</sup> | ~100% after 10000 cycles | 245  |

PCNFs: porous CNFs, HPCNFs: hierarchical PCNFs, ACNFs: activated CNFs, NCNFs: nitrogen-doped CNFs, S<sub>BET</sub>: BET specific surface area, V<sub>total</sub>: total pore volume, V<sub>micro</sub>: micropore volume, σ: conductivity, THF: tetrahydrofuran, rGO: reduced graphene oxide, SDS: sodium dodecyl sulfate, MWCNTs: Multiwalled carbon nanotubes, DMAc: dimethylacetamide, CVD: chemical vapor deposition, PFA: poly(furfuryl alcohol), C<sub>4</sub>F<sub>8</sub>: octafluorocyclobutane, l-PMMA: low-molecular weight PMMA, h-PMMA: high-molecular weight PMMA, PMDA: pyromellitic dianhydride, ODA: 4,4'-oxydianiline, PAA-*b*-PAN-*b*-PAA: polyacrylic acid-*b*-

polyacrylonitrile-*b*-polyacrylic acid, poly(ST-co-DVB-co-NaSS): poly(styrene-*co*-divinylbenzene-*co*-styrene sulfonate), POSS: polyhedral oligomeric silsesquioxane, SDBS: sodium dodecyl benzene sulfonate, PLLA: poly-L-lactic acid, NMP: 1-methyl-2-pyrrolidinone, DMSO: dimethyl sulfone, SAN: styrene-acrylonitrile copolymer, P(AN-*co*-IA): poly(acrylonitrile-*co*-itaconic acid), PAA-TEA: poly(amide acid)-triethylamine salt, EMIMBF<sub>4</sub>: 1-ethyl-3-methylimidazolium tetrafluoroborate, EMITFSI: ethylmethylimidazolium bis (trifluoromethylsulfonyl) imide.
